# Supplementary material for: Interactions among temperature, moisture, and oxygen concentrations in controlling decomposition rates in a boreal forest soil
Source: Copernicus journal article supplement (doi:10.5194/bg-14-703-2017), 2017-02-10
Supplement: Supplementary file 1 [file bg-14-703-2017-supplement.zip]

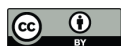

## *Supplement of*

# **Interactions among temperature, moisture, and oxygen concentrations in controlling decomposition rates in a boreal forest soil**

**Carlos A. Sierra et al.**

*Correspondence to:* Carlos A. Sierra ([csierra@bgc-jena.mpg.de](mailto:csierra@bgc-jena.mpg.de))

- [bg-14-703-2017-supplement-title-page.pdf](#)
- [CO2incubations.csv](#)
- [IncubationsAll.csv](#)
- [TWO\\_reproducibility.R](#)

The copyright of individual parts of the supplement might differ from the CC-BY 3.0 licence.
